# Supplementary material for: Synthesis and enhanced photocatalytic performance of 0D/2D CuO/tourmaline composite photocatalysts
Source: publisher site journal article supplement (doi:10.3762/bjnano.11.31), 2020-03-02
Supplement: Additional file 1 [file 2190-4286-11-31-S1.pdf]

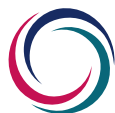

## Supporting Information

for

### **Synthesis and enhanced photocatalytic performance of 0D/2D CuO/tourmaline composite photocatalysts**

Changqiang Yu, Min Wen, Zhen Tong, Shuhua Li, Yanhong Yin, Xianbin Liu, Yesheng Li, Tongxiang Liang, Ziping Wu and Dionysios D. Dionysiou

*Beilstein J. Nanotechnol.* **2020**, *11*, 407–416. doi:10.3762/bjnano.11.31

## Additional experimental data

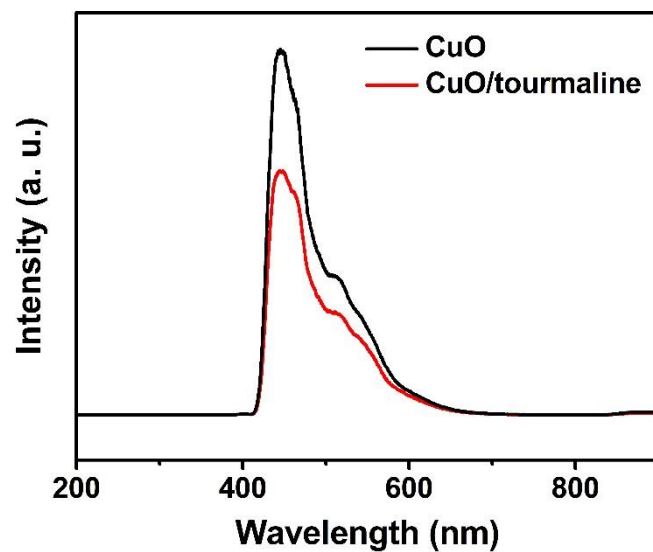

**Figure S1:** PL spectra of the CuO and CuO/tourmaline composite.

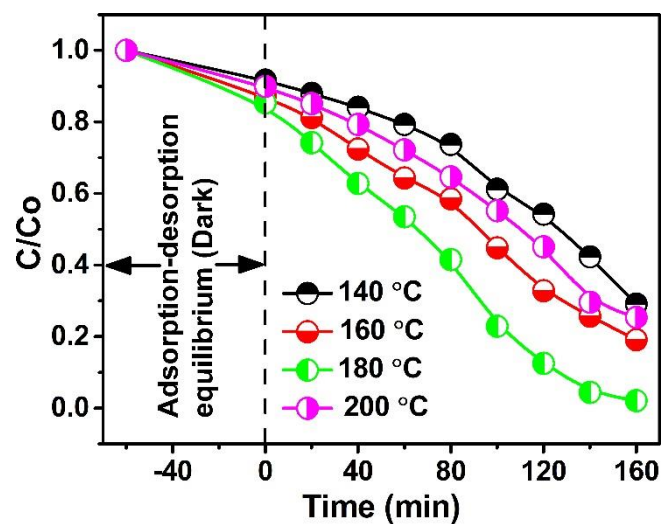

**Figure S2:** Photocatalytic degradation curves of MB by the CuO/tourmaline composite with different synthesis temperatures.

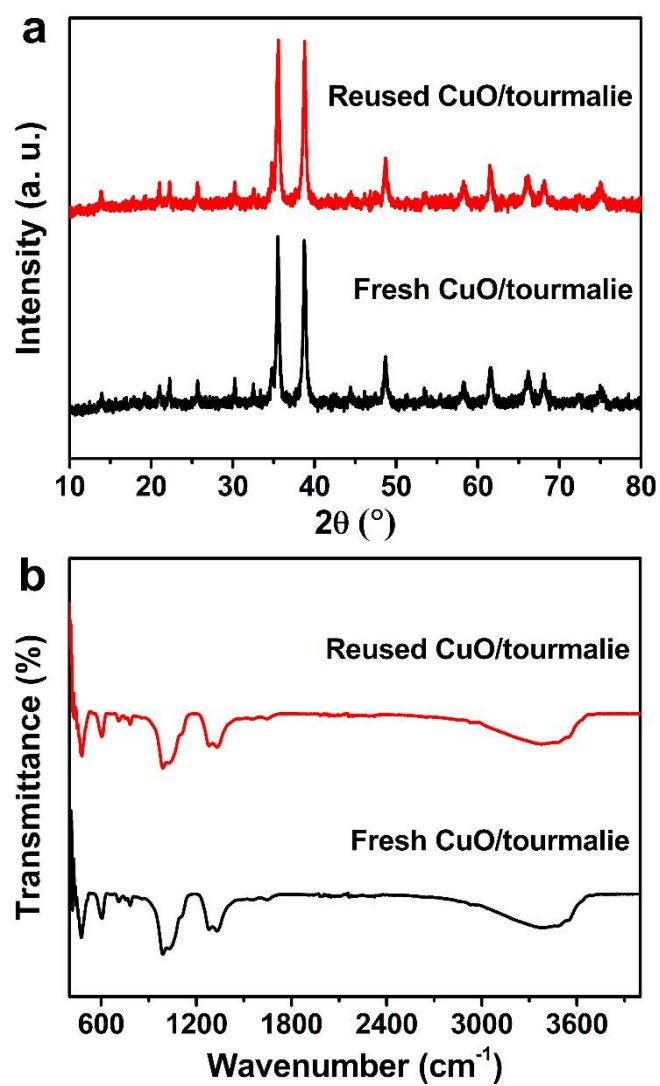

**Figure S3:** (a) XRD patterns and (b) FTIR spectra of the fresh and reused CuO/tourmaline composite.
